# Supplementary material
Source: PubMed Central journal article supplement (PMC6745496)

**Figure 6A**

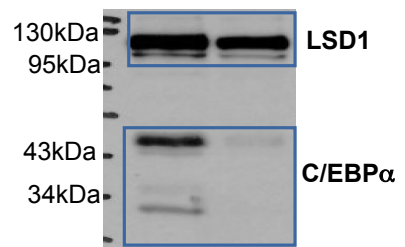

Supplement: EMBJ-38-e101426-s006.pdf [file EMBJ-38-e101426-s006.pdf]
